# Supplementary material for: Survival of Patients with Sinonasal Cancers in a Population-Based Registry, Lombardy, Italy, 2008–2023
Source: MDPI journal article supplement (doi:10.3390/cancers16050896), 2024-02-23
Supplement: s1 [file s1]

**Supplementary Table S1.** Previous malignant tumours (any site), head and neck radiotherapy for other diseases, sinonasal diseases, and oestrogen therapy in patients with sinonasal cancer (SNC) by gender; Lombardy SNC Registry, 2008-2020.

| Variable                        | Males |      | Females |      | P-value <sup>a</sup> |
|---------------------------------|-------|------|---------|------|----------------------|
|                                 | No.   | %    | No      | %    |                      |
| Malignant tumour                |       |      |         |      | 0.31                 |
| No                              | 405   | 73.2 | 205     | 74.8 |                      |
| Yes                             | 78    | 14.1 | 29      | 10.6 |                      |
| Unknown                         | 70    | 12.7 | 40      | 14.6 |                      |
| Radiotherapy                    |       |      |         |      | 0.01                 |
| No                              | 489   | 88.4 | 224     | 81.8 |                      |
| Yes                             | 11    | 2.0  | 3       | 1.1  |                      |
| Unknown                         | 53    | 9.6  | 47      | 17.2 |                      |
| Polyps                          |       |      |         |      | 0.01                 |
| No                              | 469   | 84.8 | 211     | 77.0 |                      |
| Yes                             | 34    | 6.2  | 18      | 6.6  |                      |
| Unknown                         | 50    | 9.0  | 45      | 16.4 |                      |
| Hypertrophy of nasal turbinates |       |      |         |      | 0.02                 |
| No                              | 476   | 86.1 | 215     | 78.5 |                      |
| Yes                             | 23    | 4.2  | 17      | 6.2  |                      |
| Unknown                         | 54    | 9.8  | 42      | 15.3 |                      |
| Allergic rhinitis               |       |      |         |      | <0.001               |
| No                              | 458   | 82.8 | 199     | 72.6 |                      |
| Yes                             | 40    | 7.2  | 30      | 11.0 |                      |
| Unknown                         | 55    | 10.0 | 45      | 16.4 |                      |
| Rhinosinusitis                  |       |      |         |      | 0.01                 |
| No                              | 418   | 75.6 | 183     | 66.8 |                      |
| Yes                             | 82    | 14.8 | 47      | 17.2 |                      |
| Unknown                         | 53    | 9.6  | 44      | 16.1 |                      |
| Deviated septum                 |       |      |         |      | <0.001               |
| No                              | 408   | 73.8 | 200     | 73.0 |                      |
| Yes                             | 94    | 17.0 | 28      | 10.2 |                      |
| Unknown                         | 51    | 9.2  | 46      | 16.8 |                      |
| Malignant tumour                |       |      |         |      | 0.31                 |
| No                              | 405   | 73.2 | 205     | 74.8 |                      |
| Yes                             | 78    | 14.1 | 29      | 10.6 |                      |
| Unknown                         | 70    | 12.7 | 40      | 14.6 |                      |
| Radiotherapy                    |       |      |         |      | 0.01                 |
| No                              | 489   | 88.4 | 224     | 81.8 |                      |
| Yes                             | 11    | 2.0  | 3       | 1.1  |                      |
| Unknown                         | 53    | 9.6  | 47      | 17.2 |                      |
| Oestrogen therapy               |       |      |         |      | <0.001               |
| No                              | 511   | 92.4 | 154     | 56.2 |                      |
| Yes                             | 0     | 0    | 74      | 27.0 |                      |
| Unknown                         | 42    | 7.6  | 46      | 16.8 |                      |

<sup>a</sup> From chi-squared test.
